# Supplementary material for: Autism-like social deficit generated by Dock4 deficiency is rescued by restoration of Rac1 activity and NMDA receptor function
Source: PubMed Central journal article supplement (PMC8159750; doi:10.1038/s41380-019-0472-7), 2019-08-06
Supplement: 41380_2019_472_MOESM2_ESM.pdf [file 41380_2019_472_MOESM2_ESM.pdf]

**Supplementary Table 1 *DOCK4* variations associated with autism spectrum disorder**

| <i>DOCK4</i> variation <sup>1</sup>                                   | SNP ID      | Variant type                | Allele change         | Protein change                                     | Phenotype                                                                                                                    | PUBMED ID             | AUTHOR, YEAR                                          |
|-----------------------------------------------------------------------|-------------|-----------------------------|-----------------------|----------------------------------------------------|------------------------------------------------------------------------------------------------------------------------------|-----------------------|-------------------------------------------------------|
| 7:111796377 (A>C)                                                     | rs2217262   | Intron_variant              | c.37+49780T>G         | /                                                  |                                                                                                                              | 19401682;<br>24599690 | Maestrini E, et al. (2010);<br>Liang S, et al. (2014) |
| 7:111732571 (C>G)                                                     | rs7785891   | Intron_variant              | c.38-88385G>C         | /                                                  |                                                                                                                              | 26176695              | Warrier V, et al. (2015)                              |
| 7:111584840 (A>G)                                                     |             | Intron_variant              | c.844-26T>C           | /                                                  |                                                                                                                              | 25363768              | lossifov I, et al. (2014)                             |
| 7:111428810 (C>T)                                                     | rs200443099 | Intron_variant <sup>2</sup> | c.3316-7G>A           | /                                                  |                                                                                                                              | 23999528              | Toma C, et al. (2013)                                 |
| 7:111381201 (T>C)                                                     |             | Synonymous_variant          | A>G                   | /                                                  |                                                                                                                              | 28714951              | Lim ET , et al. (2017)                                |
| 7:111487098 (C>T)                                                     | rs2074130   | Missense                    | c.2558G>A             | p.R853H                                            | Dyslexia                                                                                                                     | 26184631              | Shao S, et al. (2016)                                 |
| 7:111398732 (C>T)                                                     | rs373247688 | Missense                    | c.4250G>A             | p.R1417H                                           |                                                                                                                              | 25363768              | lossifov I, et al. (2014)                             |
| 7:111585776 (AAG>A)                                                   |             | Frame-shift                 | c.777CTT>T            | Frame shift<br>after 259 a.a.,<br>stop at 265 a.a. |                                                                                                                              | 25363768              | lossifov I, et al. (2014)                             |
| Deletion at<br>7:110663978-<br>111257682                              |             | CNV                         | Exon 27-52<br>deleted | Frame shift<br>after 945 a.a.,<br>stop at 947 a.a. | Dyslexia/poor<br>reading ability                                                                                             | 20346443              | Pagnamenta AT, et al.<br>(2010)                       |
| Deletion at<br>7:111777402 -<br>111865491<br>(on Assembly<br>GRCh38)  |             | CNV                         | Exon 23-35<br>deleted | Frame shift<br>after 760 a.a.,<br>stop at 783 a.a. | Microcephaly,<br>characteristic<br>face,<br>intellectual<br>disability, motor<br>coordination<br>deficits,<br>language delay | 30208311              | Kushima et al. (2018)                                 |
| Duplication at<br>7:110707538 -<br>111450107                          |             | CNV                         |                       |                                                    |                                                                                                                              | 19401682              | Maestrini E, et al. (2010)                            |
| Deletion or duplication<br>at 7q31.1 that spans<br><i>DOCK</i> region |             | CNV                         |                       |                                                    |                                                                                                                              |                       | Multiple studies <sup>3</sup>                         |

<sup>1</sup>Positions are indicated according to Assembly GRCh37 unless otherwise stated

<sup>2</sup>This SNP causes start codon loss in one small transcript of *DOCK4* (ENST00000417165.1)

<sup>3</sup>7q31.1 CNVs (that spans *DOCK4* region) linked to ASD can be found in the following databases:

Autism database (AutDB): <http://autism.mindspec.org/GeneDetail/DOCK4>

AutismKB: [http://db.cbi.pku.edu.cn/autismkb\\_v2/gene\\_evidence\\_detail.php?entrez\\_id=9732](http://db.cbi.pku.edu.cn/autismkb_v2/gene_evidence_detail.php?entrez_id=9732)

SFARI (Simons Foundation Autism Research Initiative) Gene: <https://gene.sfari.org/database/human-gene/DOCK4>
