# Supplementary material for: Autism-like social deficit generated by Dock4 deficiency is rescued by restoration of Rac1 activity and NMDA receptor function
Source: PubMed Central journal article supplement (PMC8159750; doi:10.1038/s41380-019-0472-7), 2019-08-06
Supplement: 41380_2019_472_MOESM3_ESM.pdf [file 41380_2019_472_MOESM3_ESM.pdf]

**Supplementary Table 2 Statistical details of behavior studies of WT, HET and KO mice**

| Test               | # of Animal                             | Measurement             | Note                      | Genotype | Average | s.e.m | <i>P</i> value (Statistical Test + <i>post hoc</i> Test) | Fig. |
|--------------------|-----------------------------------------|-------------------------|---------------------------|----------|---------|-------|----------------------------------------------------------|------|
| Open field -male   | WT=11<br>HET=9<br>KO=11                 | Distance traveled (m)   | -                         | WT       | 76.86   | 5.758 | -                                                        | 1f   |
|                    |                                         |                         | -                         | HET      | 73.77   | 5.107 | -                                                        |      |
|                    |                                         |                         | -                         | KO       | 70.4    | 5.53  | -                                                        |      |
| Open field -female | WT=9<br>HET=11<br>HET=3<br>KO=8<br>KO=4 |                         | -                         | WT       | 77.75   | 9.942 | -                                                        |      |
|                    |                                         |                         | -                         | HET      | 66.42   | 4.798 | p<0.0001 (Unpaired <i>t</i> test)                        |      |
|                    |                                         |                         | Hyperactivity             | HET      | 187.6   | 14.51 |                                                          |      |
|                    |                                         |                         | -                         | KO       | 73.33   | 5.952 | p<0.0001 (Unpaired <i>t</i> test)                        |      |
|                    |                                         |                         | Hyperactivity             | KO       | 265.3   | 40.6  |                                                          |      |
| USV                | WT=28<br>HET=39<br>KO=13                |                         | Number of calls /<br>5min | Day3     | WT      | 113.7 | 17.86                                                    |      |
|                    |                                         | HET                     |                           |          | 94.23   | 16.18 | p=0.4820 (One-way ANOVA + B <sup>1</sup> )               |      |
|                    |                                         | KO                      |                           |          | 199.2   | 45.4  | p=0.0245 (One-way ANOVA + B)                             |      |
|                    | WT=28<br>HET=41<br>KO=15                | Day6                    |                           | WT       | 332.9   | 39.83 | -                                                        |      |
|                    |                                         |                         |                           | HET      | 355.3   | 38.74 | p=0.7107 (One-way ANOVA + B)                             |      |
|                    |                                         |                         |                           | KO       | 422.1   | 75.84 | p=0.2587 (One-way ANOVA + B)                             |      |
|                    | WT=29<br>HET=38<br>KO=15                | Day9                    |                           | WT       | 271.6   | 40.63 | -                                                        |      |
|                    |                                         |                         |                           | HET      | 258.7   | 28.34 | p=0.8034 (One-way ANOVA + B)                             |      |
|                    |                                         |                         |                           | KO       | 362.4   | 68.21 | p=0.1753 (One-way ANOVA + B)                             |      |
|                    | WT=26<br>HET=38<br>KO=13                | Day12                   |                           | WT       | 121.9   | 26.18 | -                                                        |      |
|                    |                                         |                         |                           | HET      | 106.8   | 20.34 | p=0.7034 (One-way ANOVA + B)                             |      |
|                    |                                         |                         |                           | KO       | 241.5   | 69.41 | p=0.0260 (One-way ANOVA + B)                             |      |
|                    | WT=28                                   | Total call duration (s) |                           | Day3     | WT      | 2.181 | 0.3932                                                   | -    |

|                          |                          |                      |       |       |                              |                              |                              |     |
|--------------------------|--------------------------|----------------------|-------|-------|------------------------------|------------------------------|------------------------------|-----|
|                          | HET=39<br>KO=13          | Peak frequency (kHz) |       | HET   | 2.072                        | 0.4378                       | p=0.8922 (One-way ANOVA + B) | S6b |
|                          | KO                       |                      |       | 5.84  | 1.594                        | p=0.0011 (One-way ANOVA + B) |                              |     |
|                          | WT=28<br>HET=41<br>KO=15 |                      | Day6  | WT    | 8.009                        | 1.283                        | -                            |     |
|                          |                          |                      |       | HET   | 7.774                        | 1.184                        | p=0.9047 (One-way ANOVA + B) |     |
|                          |                          |                      |       | KO    | 11.65                        | 2.754                        | p=0.1567 (One-way ANOVA + B) |     |
|                          | WT=29<br>HET=38<br>KO=15 |                      | Day9  | WT    | 6.945                        | 1.507                        | -                            |     |
|                          |                          |                      |       | HET   | 5.959                        | 0.8831                       | p=0.5851 (One-way ANOVA + B) |     |
|                          |                          |                      |       | KO    | 10.4                         | 2.45                         | p=0.1402 (One-way ANOVA + B) |     |
|                          | WT=26<br>HET=38<br>KO=13 |                      | Day12 | WT    | 2.159                        | 0.5424                       | -                            |     |
|                          |                          |                      |       | HET   | 1.679                        | 0.3727                       | p=0.5921 (One-way ANOVA + B) |     |
|                          |                          |                      |       | KO    | 4.987                        | 1.831                        | p=0.0202 (One-way ANOVA + B) |     |
|                          | WT=28<br>HET=39<br>KO=13 |                      | Day3  | WT    | 87.4                         | 4.928                        | -                            |     |
|                          |                          |                      |       | HET   | 87.28                        | 2.768                        | p=0.9795 (One-way ANOVA + B) |     |
|                          |                          |                      |       | KO    | 98.26                        | 2.138                        | p=0.1079 (One-way ANOVA + B) |     |
|                          | WT=28<br>HET=41<br>KO=15 |                      | Day6  | WT    | 88.48                        | 1.492                        | -                            |     |
|                          |                          |                      |       | HET   | 87.88                        | 0.9857                       | p=0.7622 (One-way ANOVA + B) |     |
|                          |                          |                      |       | KO    | 89.52                        | 3.12                         | p=0.6884 (One-way ANOVA + B) |     |
|                          | WT=29<br>HET=38<br>KO=15 |                      | Day9  | WT    | 90.2                         | 2.346                        | -                            |     |
|                          |                          |                      |       | HET   | 93.89                        | 1.355                        | p=0.1593 (One-way ANOVA + B) |     |
|                          |                          |                      |       | KO    | 93.68                        | 2.844                        | p=0.3013 (One-way ANOVA + B) |     |
| WT=26<br>HET=38<br>KO=13 | Day12                    | WT                   | 86.34 | 5.065 | -                            |                              |                              |     |
|                          |                          | HET                  | 82.78 | 4.71  | p=0.5851 (One-way ANOVA + B) |                              |                              |     |
|                          |                          | KO                   | 93.24 | 1.677 | p=0.4291 (One-way ANOVA + B) |                              |                              |     |
| <b>Nesting - male</b>    | WT=27                    | Score (0-5)          | -     | WT    | 3.87                         | 0.2226                       | -                            | S6d |

|                             |                          |                                        |               |       |        |                              |                                                                                 |     |
|-----------------------------|--------------------------|----------------------------------------|---------------|-------|--------|------------------------------|---------------------------------------------------------------------------------|-----|
|                             | HET=12<br>KO=19          |                                        | -             | HET   | 4      | 0.2752                       | p>0.9999 (Kruskal-Wallis test +D <sup>2</sup> )                                 | S6e |
|                             |                          |                                        | -             | KO    | 3.237  | 0.3138                       | p=0.1314 (Kruskal-Wallis test +D)                                               |     |
|                             |                          | untorn nestlets (g)                    | -             | WT    | 0.5911 | 0.1587                       | -                                                                               |     |
|                             |                          |                                        | -             | HET   | 0.3442 | 0.2121                       | p=0.9050 (One-way ANOVA + B)                                                    |     |
|                             |                          |                                        | -             | KO    | 0.8663 | 0.2706                       | p=0.6657 (One-way ANOVA + B)                                                    |     |
| <b>Nesting - female</b>     | WT=23<br>HET=10<br>KO=20 | Score (0–5)                            | -             | WT    | 3.739  | 0.2152                       | -                                                                               | S6d |
|                             |                          |                                        | -             | HET   | 3.85   | 0.2587                       | p>0.9999 (Kruskal-Wallis test +D)                                               |     |
|                             |                          |                                        | -             | KO    | 3.75   | 0.2099                       | p>0.9999 (Kruskal-Wallis test +D)                                               |     |
|                             |                          | untorn nestlets (g)                    | -             | WT    | 0.5383 | 0.1678                       | -                                                                               | S6e |
|                             |                          |                                        | -             | HET   | 0.189  | 0.1516                       | p=0.3919 (One-way ANOVA + B)                                                    |     |
|                             |                          |                                        | -             | KO    | 0.408  | 0.1489                       | p>0.9999 (One-way ANOVA + B)                                                    |     |
| <b>Pup retrieval</b>        | WT=13<br>HET=12<br>KO=9  | Latency (s)                            | First pup     | WT    | 185.9  | 48.5                         | -                                                                               | 1h  |
|                             |                          |                                        |               | HET   | 246.8  | 58.26                        | p=0.4351 (One-way ANOVA + B)                                                    |     |
|                             |                          |                                        |               | KO    | 434    | 67.98                        | p=0.0057 (One-way ANOVA + B)                                                    |     |
|                             |                          | Last pup                               | WT            | 340.1 | 52.74  | -                            |                                                                                 |     |
|                             |                          |                                        | HET           | 337.8 | 62.55  | p=0.9754 (One-way ANOVA + B) |                                                                                 |     |
|                             |                          |                                        | KO            | 516.3 | 43.48  | p=0.0377 (One-way ANOVA + B) |                                                                                 |     |
| <b>Three chamber - male</b> | WT=15<br>HET=13<br>KO=14 | Sniffing time (s) -<br>Social approach | Mouse (S1)    | WT    | 120.9  | 11.78                        | p=0.0024 (Unpaired <i>t</i> test);<br>p=0.0004(Two-way ANOVA + B <sup>3</sup> ) | 1j  |
|                             |                          |                                        | Empty (E)     | WT    | 75.57  | 6.777                        |                                                                                 |     |
|                             |                          |                                        | Mouse (S1)    | HET   | 122.3  | 9.505                        | p<0.0001 (Unpaired <i>t</i> test);<br>p<0.0001 (Two-way ANOVA + B)              |     |
|                             |                          |                                        | Empty (E)     | HET   | 58.41  | 5.481                        |                                                                                 |     |
|                             |                          |                                        | Mouse (S1)    | KO    | 104.2  | 8.898                        | p<0.0001 (Unpaired <i>t</i> test); p=0.0001<br>(Two-way ANOVA + B)              |     |
|                             |                          |                                        | Empty (E)     | KO    | 52.49  | 4.504                        |                                                                                 |     |
|                             |                          | Sniffing time (s) -                    | Familial (S1) | WT    | 51.14  | 6.551                        | p=0.0031 (Unpaired <i>t</i> test); p=0.0032                                     |     |

|                        |                                          |                                           |            |       |       |                                                                    |                                            |                                                                             |     |
|------------------------|------------------------------------------|-------------------------------------------|------------|-------|-------|--------------------------------------------------------------------|--------------------------------------------|-----------------------------------------------------------------------------|-----|
|                        | Social novelty                           | Unfamiliar (S2)                           | WT         | 97.52 | 12.71 | (Two-way ANOVA + B)                                                |                                            |                                                                             |     |
|                        |                                          | Familial (S1)                             | HET        | 60.59 | 8.576 | p=0.0116 (Unpaired <i>t</i> test); p=0.0518<br>(Two-way ANOVA + B) |                                            |                                                                             |     |
|                        |                                          | Unfamiliar (S2)                           | HET        | 96.28 | 9.838 |                                                                    |                                            |                                                                             |     |
|                        |                                          | Familial (S1)                             | KO         | 54.65 | 8.703 | p=0.5017 (Unpaired <i>t</i> test); p>0.9999<br>(Two-way ANOVA + B) |                                            |                                                                             |     |
|                        |                                          | Unfamiliar (S2)                           | KO         | 64.7  | 11.91 |                                                                    |                                            |                                                                             |     |
|                        |                                          |                                           |            |       |       |                                                                    |                                            |                                                                             |     |
|                        |                                          | Duration in chamber (s) - Social approach | Mouse (S1) | WT    | 292.7 | 12.44                                                              |                                            | p<0.0001 (One-way ANOVA + B);<br>p=0.0005 (Two-way ANOVA + D <sup>4</sup> ) | S6f |
|                        |                                          |                                           | Empty (E)  | WT    | 219.3 | 12.1                                                               |                                            |                                                                             |     |
|                        |                                          |                                           | Center (C) | WT    | 87.03 | 10.28                                                              |                                            | -                                                                           |     |
|                        |                                          |                                           | Mouse (S1) | HET   | 320.7 | 12.59                                                              |                                            | p<0.0001 (One-way ANOVA + B);<br>p=0.0001 (Two-way ANOVA + D)               |     |
|                        | Empty (E)                                |                                           | HET        | 189.7 | 11.65 |                                                                    |                                            |                                                                             |     |
|                        | Center (C)                               |                                           | HET        | 88.36 | 8.241 | -                                                                  |                                            |                                                                             |     |
|                        | Mouse (S1)                               |                                           | KO         | 317.8 | 17.1  | p<0.0001 (One-way ANOVA + B);<br>p=0.0001 (Two-way ANOVA + D)      |                                            |                                                                             |     |
|                        | Empty (E)                                |                                           | KO         | 200.9 | 19.62 |                                                                    |                                            |                                                                             |     |
|                        | Center (C)                               |                                           | KO         | 80.1  | 6.973 | -                                                                  |                                            |                                                                             |     |
|                        | Duration in chamber (s) - Social novelty | Mouse (S1)                                | WT         | 214.4 | 15.22 | p=0.0015 (One-way ANOVA + B);<br>p=0.0355 (Two-way ANOVA + D)      | S6h                                        |                                                                             |     |
|                        |                                          | Mouse (S2)                                | WT         | 284.2 | 17.88 |                                                                    |                                            |                                                                             |     |
|                        |                                          | Center (C)                                | WT         | 94.88 | 8.352 | -                                                                  |                                            |                                                                             |     |
|                        |                                          | Mouse (S2)                                | HET        | 237   | 18.81 | p=0.2157 (One-way ANOVA + B);<br>p=0.8552 (Two-way ANOVA + D)      |                                            |                                                                             |     |
|                        |                                          | Empty (E)                                 | HET        | 265   | 18.05 |                                                                    |                                            |                                                                             |     |
|                        |                                          | Center (C)                                | HET        | 94.45 | 7.892 | -                                                                  |                                            |                                                                             |     |
|                        |                                          | Mouse (S2)                                | KO         | 267.3 | 26.57 | p=0.4806 (One-way ANOVA + B);<br>p=0.9281 (Two-way ANOVA + D)      |                                            |                                                                             |     |
|                        |                                          | Empty (E)                                 | KO         | 244.2 | 27.67 |                                                                    |                                            |                                                                             |     |
|                        |                                          | Center (C)                                | KO         | 87.45 | 10.56 | -                                                                  |                                            |                                                                             |     |
| <b>Three chamber -</b> | WT=13                                    | Sniffing time (s) -                       | Mouse (S1) | WT    | 100.4 | 10.28                                                              | p=0.012 (Unpaired <i>t</i> test); p=0.0096 | 1k                                                                          |     |

| female                                       | HET=13<br>KO=12 | Social approach | Empty (E)  | WT                                                              | 68.36                                                           | 5.962 | (Two-way ANOVA + B)                                             |  |
|----------------------------------------------|-----------------|-----------------|------------|-----------------------------------------------------------------|-----------------------------------------------------------------|-------|-----------------------------------------------------------------|--|
|                                              |                 |                 | Mouse (S1) | HET                                                             | 80.45                                                           | 5.678 | p=0.0082 (Unpaired <i>t</i> test); p=0.0416 (Two-way ANOVA + B) |  |
| Empty (E)                                    | HET             | 53.95           | 7.235      | (Two-way ANOVA + B)                                             |                                                                 |       |                                                                 |  |
| Mouse (S1)                                   | KO              | 84.31           | 8.518      | p=0.0287 (Unpaired <i>t</i> test); p=0.0774 (Two-way ANOVA + B) |                                                                 |       |                                                                 |  |
| Empty (E)                                    | KO              | 59.43           | 6.351      | (Two-way ANOVA + B)                                             |                                                                 |       |                                                                 |  |
| Sniffing time (s) -<br>Social novelty        | Familial (S1)   | WT              | 48.84      | 4.727                                                           | p=0.0017 (Unpaired <i>t</i> test); p=0.0021 (Two-way ANOVA + B) |       | 1m                                                              |  |
|                                              | Unfamiliar (S2) | WT              | 82.05      | 8.105                                                           | (Two-way ANOVA + B)                                             |       |                                                                 |  |
|                                              | Familial (S1)   | HET             | 45.55      | 7.602                                                           | p=0.4077 (Unpaired <i>t</i> test); p>0.9999 (Two-way ANOVA + B) |       |                                                                 |  |
|                                              | Unfamiliar (S2) | HET             | 53.12      | 4.788                                                           | (Two-way ANOVA + B)                                             |       |                                                                 |  |
|                                              | Familial (S1)   | KO              | 43.79      | 7.543                                                           | p=0.4379 (Unpaired <i>t</i> test); p>0.9999 (Two-way ANOVA + B) |       |                                                                 |  |
|                                              | Unfamiliar (S2) | KO              | 51.78      | 6.721                                                           | (Two-way ANOVA + B)                                             |       |                                                                 |  |
| Duration in chamber<br>(s) - Social approach | Mouse (S1)      | WT              | 270.1      | 15.04                                                           | p=0.012 (One-way ANOVA + B); p=0.031 (Two-way ANOVA + D)        |       | S6g                                                             |  |
|                                              | Empty (E)       | WT              | 216.9      | 15.55                                                           | (Two-way ANOVA + D)                                             |       |                                                                 |  |
|                                              | Center (C)      | WT              | 112.6      | 11.94                                                           | -                                                               |       |                                                                 |  |
|                                              | Mouse (S1)      | HET             | 261.2      | 9.544                                                           | p=0.0044 (One-way ANOVA + B); p=0.0075 (Two-way ANOVA + D)      |       |                                                                 |  |
|                                              | Empty (E)       | HET             | 196        | 17.37                                                           | (Two-way ANOVA + D)                                             |       |                                                                 |  |
|                                              | Center (C)      | HET             | 142.7      | 17.28                                                           | -                                                               |       |                                                                 |  |
|                                              | Mouse (S1)      | KO              | 271.2      | 19.14                                                           | p=0.0683 (One-way ANOVA + B); p=0.0698 (Two-way ANOVA + D)      |       |                                                                 |  |
|                                              | Empty (E)       | KO              | 222.9      | 23.2                                                            | (Two-way ANOVA + D)                                             |       |                                                                 |  |
|                                              | Center (C)      | KO              | 105.7      | 8.905                                                           | -                                                               |       |                                                                 |  |
| Duration in chamber<br>(s) - Social novelty  | Mouse (S1)      | WT              | 186        | 14.97                                                           | p<0.0001 (One-way ANOVA + B); p=0.0001 (Two-way ANOVA + D)      |       | S6i                                                             |  |
|                                              | Empty (E)       | WT              | 291.2      | 19.24                                                           | (Two-way ANOVA + D)                                             |       |                                                                 |  |
|                                              | Center (C)      | WT              | 122.2      | 13.18                                                           | -                                                               |       |                                                                 |  |
|                                              | Mouse (S1)      | HET             | 209        | 19.53                                                           | p=0.0621 (One-way ANOVA + B);                                   |       |                                                                 |  |

|                                  |                          |                                           |            |     |        |        |                                                               |     |
|----------------------------------|--------------------------|-------------------------------------------|------------|-----|--------|--------|---------------------------------------------------------------|-----|
|                                  |                          |                                           | Empty (E)  | HET | 256.9  | 18.97  | p=0.0779 (Two-way ANOVA + D)                                  |     |
|                                  |                          |                                           | Center (C) | HET | 133.5  | 13.77  | -                                                             |     |
|                                  |                          |                                           | Mouse (S1) | KO  | 234.7  | 17.09  | p=0.6708 (One-way ANOVA + B);<br>p=0.8841 (Two-way ANOVA + D) |     |
|                                  |                          |                                           | Empty (E)  | KO  | 244.7  | 20.15  |                                                               |     |
|                                  |                          |                                           | Center (C) | KO  | 119.8  | 11.07  | -                                                             |     |
| <b>Elevated zero maze - male</b> | WT=19<br>HET=17<br>KO=15 | Distance traveled (m)                     | -          | WT  | 8.873  | 0.8724 | -                                                             | 2a  |
|                                  |                          |                                           | -          | HET | 7.865  | 0.4897 | p=0.2783 (One-way ANOVA + B)                                  |     |
|                                  |                          |                                           | -          | KO  | 6.209  | 0.4265 | p=0.0073 (One-way ANOVA + B)                                  |     |
|                                  |                          | Distance traveled (m)-<br>closed sections | -          | WT  | 7.487  | 0.5972 | -                                                             | S7a |
|                                  |                          |                                           | -          | HET | 6.994  | 0.3894 | p=0.4582 (One-way ANOVA + B)                                  |     |
|                                  |                          |                                           | -          | KO  | 5.624  | 0.3366 | p=0.0088 (One-way ANOVA + B)                                  |     |
|                                  |                          | Distance traveled (m)-<br>open sections   | -          | WT  | 1.386  | 0.3105 | -                                                             | S7c |
|                                  |                          |                                           | -          | HET | 0.8708 | 0.1562 | p=0.1125 (One-way ANOVA + B)                                  |     |
|                                  |                          |                                           | -          | KO  | 0.585  | 0.1395 | p=0.0189 (One-way ANOVA + B)                                  |     |
|                                  |                          | Duration in sections<br>(%)               | Open       | WT  | 12.29  | 1.477  | -                                                             | 2b  |
|                                  |                          |                                           |            | HET | 10.76  | 1.443  | p=0.4724 (One-way ANOVA + B)                                  |     |
|                                  |                          |                                           |            | KO  | 7.579  | 1.717  | p=0.0365 (One-way ANOVA + B)                                  |     |
|                                  |                          | Number of entries                         | Open       | WT  | 10.68  | 1.508  | -                                                             | 2c  |
|                                  |                          |                                           |            | HET | 7.647  | 1.029  | p=0.0831 (One-way ANOVA + B)                                  |     |
|                                  |                          |                                           |            | KO  | 5.8    | 0.9817 | p=0.0084 (One-way ANOVA + B)                                  |     |
|                                  |                          | Velocity (mm/s) -<br>closed sections      | -          | WT  | 29.17  | 2.822  | -                                                             | S7b |
|                                  |                          |                                           | -          | HET | 26.46  | 1.686  | p=0.1068 (One-way ANOVA + B)                                  |     |
|                                  |                          |                                           | -          | KO  | 20.56  | 1.493  | p=0.0251 (One-way ANOVA + B)                                  |     |
|                                  |                          | Velocity (mm/s) -                         | -          | WT  | 31.84  | 3.568  | -                                                             | S7d |

|                                    |                          |                                          |          |     |       |        |                                   |     |
|------------------------------------|--------------------------|------------------------------------------|----------|-----|-------|--------|-----------------------------------|-----|
|                                    |                          | open sections                            | -        | HET | 25.14 | 2.226  | p=0.1068 (One-way ANOVA + B)      |     |
|                                    |                          |                                          | -        | KO  | 22.08 | 2.636  | p=0.0086 (One-way ANOVA + B)      |     |
| <b>Elevated zero maze - female</b> | WT=22<br>HET=13<br>KO=11 | Distance traveled (m)                    | -        | WT  | 8.905 | 0.6067 | -                                 | 2a  |
|                                    |                          |                                          | -        | HET | 9.154 | 0.7395 | p=0.7915 (One-way ANOVA + B)      |     |
|                                    |                          |                                          | -        | KO  | 6.578 | 0.6806 | p=0.0228 (One-way ANOVA + B)      |     |
|                                    |                          | Distance traveled (m)-<br>closed section | -        | WT  | 7.387 | 0.3826 | -                                 | S7a |
|                                    |                          |                                          | -        | HET | 7.863 | 0.5552 | p=0.5621 (One-way ANOVA + B)      |     |
|                                    |                          |                                          | -        | KO  | 5.575 | 0.5168 | p=0.0106 (One-way ANOVA + B)      |     |
|                                    |                          | Distance traveled (m)-<br>open section   | -        | WT  | 1.518 | 0.2882 | -                                 | S7c |
|                                    |                          |                                          | -        | HET | 1.291 | 0.239  | p=0.4632 (One-way ANOVA + B)      |     |
|                                    |                          |                                          | -        | KO  | 1.003 | 0.2317 | p=0.2164 (One-way ANOVA + B)      |     |
|                                    |                          | Duration in sections<br>(%)              | Open     | WT  | 14.19 | 2.088  | -                                 | 2b  |
|                                    |                          |                                          |          | HET | 11.82 | 1.601  | p=0.4543 (One-way ANOVA + B)      |     |
|                                    |                          |                                          |          | KO  | 11.79 | 2.639  | p=0.4361 (One-way ANOVA + B)      |     |
|                                    |                          | Number of entries                        | Open     | WT  | 10.68 | 1.573  | -                                 | 2c  |
|                                    |                          |                                          |          | HET | 9.308 | 1.337  | p=0.5243 (One-way ANOVA + B)      |     |
|                                    |                          |                                          |          | KO  | 6.636 | 1.309  | p=0.0804 (One-way ANOVA + B)      |     |
|                                    |                          | Velocity (mm/s) -<br>closed sections     | -        | WT  | 29.69 | 2.213  | -                                 | S7b |
|                                    |                          |                                          | -        | HET | 30.12 | 2.427  | p=0.3657 (One-way ANOVA + B)      |     |
|                                    |                          |                                          | -        | KO  | 21.5  | 2.237  | p=0.0219 (One-way ANOVA + B)      |     |
|                                    |                          | Velocity (mm/s) -<br>open sections       | -        | WT  | 31.23 | 2.371  | -                                 | S7d |
|                                    |                          |                                          | -        | HET | 34.9  | 3.073  | p=0.3657 (One-way ANOVA + B)      |     |
|                                    |                          |                                          | -        | KO  | 30.25 | 3.8    | p=0.8177 (One-way ANOVA + B)      |     |
| <b>Novel object</b>                | WT=13                    | Preference for object                    | Familial | WT  | 34.41 | 3.644  | p<0.0001 (Unpaired <i>t</i> test) | 2d  |

|                                          |                          |                                 |          |     |       |       |                                   |    |
|------------------------------------------|--------------------------|---------------------------------|----------|-----|-------|-------|-----------------------------------|----|
| <b>recognition - male</b>                | HET=9<br>KO=12           | (%) – 24h                       | Novel    | WT  | 65.59 | 3.644 | p=0.0004 (Unpaired <i>t</i> test) |    |
|                                          |                          |                                 | Familial | HET | 41.94 | 2.58  |                                   |    |
|                                          |                          |                                 | Novel    | HET | 58.06 | 2.58  |                                   |    |
|                                          |                          |                                 | Familial | KO  | 39.08 | 4.344 | p=0.0018 (Unpaired <i>t</i> test) |    |
|                                          |                          |                                 | Novel    | KO  | 60.92 | 4.344 |                                   |    |
| <b>Novel object recognition - female</b> | WT=17<br>HET=10<br>KO=8  | Preference for object (%) – 24h | Familial | WT  | 36.25 | 3.171 | p<0.0001 (Unpaired <i>t</i> test) | 2d |
|                                          |                          |                                 | Novel    | WT  | 63.75 | 3.171 |                                   |    |
|                                          |                          |                                 | Familial | HET | 32.96 | 4.385 | p<0.0001 (Unpaired <i>t</i> test) |    |
|                                          |                          |                                 | Novel    | HET | 67.04 | 4.385 |                                   |    |
|                                          |                          |                                 | Familial | KO  | 45.67 | 3.706 | p=0.1204 (Unpaired <i>t</i> test) |    |
|                                          |                          |                                 | Novel    | KO  | 54.33 | 3.706 |                                   |    |
| <b>Y-maze - male (working memory)</b>    | WT=19<br>HET=17<br>KO=15 | Alternation (%)                 | -        | WT  | 59.84 | 2.068 | -                                 | 2e |
|                                          |                          |                                 | -        | HET | 58    | 1.961 | p=0.4918 (One-way ANOVA + B)      |    |
|                                          |                          |                                 | -        | KO  | 53.97 | 1.566 | p=0.0374 (One-way ANOVA + B)      |    |
|                                          |                          | Number of arms entries          | -        | WT  | 39.63 | 3.454 | -                                 | 2f |
|                                          |                          |                                 | -        | HET | 41.88 | 3.375 | p=0.6603 (One-way ANOVA + B)      |    |
|                                          |                          |                                 | -        | KO  | 53.8  | 4.351 | p=0.0098 (One-way ANOVA + B)      |    |
| <b>Y-maze - female (working memory)</b>  | WT=23<br>HET=13<br>KO=12 | Alternation (%)                 | -        | WT  | 56.4  | 1.408 | -                                 | 2e |
|                                          |                          |                                 | -        | HET | 59.54 | 2.322 | p=0.2740 (One-way ANOVA + B)      |    |
|                                          |                          |                                 | -        | KO  | 56.8  | 2.956 | p=0.8923 (One-way ANOVA + B)      |    |
|                                          |                          | Number of arms entries          | -        | WT  | 42.74 | 2.709 | -                                 | 2f |
|                                          |                          |                                 | -        | HET | 43.15 | 3.901 | p=0.9324 (One-way ANOVA + B)      |    |
|                                          |                          |                                 | -        | KO  | 42.75 | 4.553 | p=0.9983 (One-way ANOVA + B)      |    |
| <b>Y-maze - male</b>                     | WT=10                    | Time in arm (%)                 | Novel    | WT  | 60.01 | 4.764 | p=0.0082 (Unpaired <i>t</i> test) | 2g |



|                           |                                         |                         |                           |       |       |       |                                   |     |
|---------------------------|-----------------------------------------|-------------------------|---------------------------|-------|-------|-------|-----------------------------------|-----|
| <b>(spatial memory)</b>   | HET=11<br>KO=7                          |                         | Familiar                  | WT    | 39.99 | 4.764 | p<0.0001 (Unpaired <i>t</i> test) |     |
|                           |                                         |                         | Novel                     | HET   | 69.29 | 2.668 |                                   |     |
|                           |                                         |                         | Familiar                  | HET   | 30.71 | 2.668 |                                   |     |
|                           |                                         |                         | Novel                     | KO    | 47.91 | 7.605 | p=0.7046 (Unpaired <i>t</i> test) |     |
|                           |                                         |                         | Familiar                  | KO    | 52.09 | 7.605 |                                   |     |
|                           |                                         |                         | Number of arm entries (%) |       | Novel | WT    | 40.31                             |     |
|                           | Familiar                                | WT                      |                           |       | 24.3  | 2.113 |                                   |     |
|                           | Novel                                   | HET                     |                           |       | 39.74 | 2.332 | p<0.0001 (Unpaired <i>t</i> test) |     |
|                           | Familiar                                | HET                     |                           |       | 21.75 | 1.867 |                                   |     |
|                           | Novel                                   | KO                      |                           |       | 34.88 | 2.515 | p=0.1301 (Unpaired <i>t</i> test) |     |
|                           | Familiar                                | KO                      |                           |       | 29.9  | 1.752 |                                   |     |
|                           | <b>Y-maze - female (spatial memory)</b> | WT=10<br>HET=8<br>KO=10 | Time in arm (%)           | Novel | WT    | 59.15 | 5.327                             |     |
| Familiar                  |                                         |                         |                           | WT    | 40.85 | 5.327 |                                   |     |
| Novel                     |                                         |                         |                           | HET   | 53.61 | 3.645 | p=0.1828 (Unpaired <i>t</i> test) |     |
| Familiar                  |                                         |                         |                           | HET   | 46.39 | 3.645 |                                   |     |
| Novel                     |                                         |                         |                           | KO    | 64.87 | 2.876 | p<0.0001 (Unpaired <i>t</i> test) |     |
| Familiar                  |                                         |                         |                           | KO    | 35.13 | 2.876 |                                   |     |
| Number of arm entries (%) |                                         |                         | Novel                     | WT    | 37.63 | 3.284 | p=0.0416 (Unpaired <i>t</i> test) |     |
|                           |                                         |                         | Familiar                  | WT    | 28.26 | 2.727 |                                   |     |
|                           |                                         |                         | Novel                     | HET   | 39.83 | 1.07  | p<0.0001 (Unpaired <i>t</i> test) |     |
|                           |                                         |                         | Familiar                  | HET   | 25.93 | 1.805 |                                   |     |
|                           |                                         |                         | Novel                     | KO    | 36.99 | 1.415 | p<0.0001 (Unpaired <i>t</i> test) |     |
|                           |                                         |                         | Familiar                  | KO    | 25.15 | 1.503 |                                   |     |
| <b>Morris water</b>       | WT=17                                   | Latency to platform     | Day1                      | WT    | 67.43 | 4.566 | -                                 | S7f |

|             |                 |     |      |     |       |       |                                                               |
|-------------|-----------------|-----|------|-----|-------|-------|---------------------------------------------------------------|
| <b>maze</b> | HET=16<br>KO=17 | (s) |      | HET | 64.71 | 5.23  | p=0.6955 (One-way ANOVA + B);<br>p=0.9996 (Two-way ANOVA + D) |
|             |                 |     |      | KO  | 70.39 | 4.807 | p=0.6657 (One-way ANOVA + B);<br>p=0.9995 (Two-way ANOVA + D) |
|             |                 |     | Day2 | WT  | 64.41 | 5.464 | -                                                             |
|             |                 |     |      | HET | 53.29 | 7.073 | p=0.1936 (One-way ANOVA + B);<br>p=0.8661 (Two-way ANOVA + D) |
|             |                 |     |      | KO  | 65.04 | 5.222 | p=0.9401 (One-way ANOVA + B);<br>p=0.9999 (Two-way ANOVA + D) |
|             |                 |     | Day3 | WT  | 52.9  | 5.852 | -                                                             |
|             |                 |     |      | HET | 47.33 | 5.75  | p=0.4889 (One-way ANOVA + B);<br>p=0.9990 (Two-way ANOVA + D) |
|             |                 |     |      | KO  | 58.84 | 5.23  | p=0.4536 (One-way ANOVA + B);<br>p=0.9988 (Two-way ANOVA + D) |
|             |                 |     | Day4 | WT  | 46.75 | 7.838 | -                                                             |
|             |                 |     |      | HET | 43.31 | 7.387 | p=0.7304 (One-way ANOVA + B);<br>p=0.9997 (Two-way ANOVA + D) |
|             |                 |     |      | KO  | 52.35 | 5.484 | p=0.5680 (One-way ANOVA + B);<br>p=0.9940 (Two-way ANOVA + D) |
|             |                 |     | Day5 | WT  | 43.27 | 7.49  | -                                                             |
|             |                 |     |      | HET | 38.96 | 6.011 | p=0.6389 (One-way ANOVA + B);<br>p=0.9996 (Two-way ANOVA + D) |
|             |                 |     |      | KO  | 46.25 | 5.562 | p=0.7420 (One-way ANOVA + B);<br>p=0.9991 (Two-way ANOVA + D) |
|             |                 |     | Day6 | WT  | 44.25 | 5.462 | -                                                             |
|             |                 |     |      | HET | 33.25 | 5.233 | p=0.1670 (One-way ANOVA + B);<br>p=0.9810 (Two-way ANOVA + D) |
|             |                 |     |      | KO  | 45.04 | 5.794 | p=0.9195 (One-way ANOVA + B);<br>p=0.9995 (Two-way ANOVA + D) |
|             |                 |     | Day7 | WT  | 37.1  | 6.079 | -                                                             |

|                       |                          |                          |          |       |                              |       |                                                               |     |
|-----------------------|--------------------------|--------------------------|----------|-------|------------------------------|-------|---------------------------------------------------------------|-----|
|                       |                          |                          |          | HET   | 31.85                        | 5.335 | p=0.5063 (One-way ANOVA + B);<br>p=0.9996 (Two-way ANOVA + D) | S7g |
|                       |                          |                          |          | KO    | 44.16                        | 5.023 | p=0.3645 (One-way ANOVA + B);<br>p=0.9416 (Two-way ANOVA + D) |     |
|                       |                          | Duration in quadrant (%) | Target   | WT    | 43.73                        | 4.025 | p<0.0001 (Unpaired <i>t</i> test)                             |     |
|                       |                          |                          | Opposite | WT    | 13.48                        | 2.488 |                                                               |     |
|                       |                          |                          | Target   | HET   | 33.78                        | 2.611 | p=0.0003 (Unpaired <i>t</i> test)                             |     |
|                       |                          |                          | Opposite | HET   | 18.62                        | 2.57  |                                                               |     |
|                       |                          |                          | Target   | KO    | 34.73                        | 2.995 | p<0.0001 (Unpaired <i>t</i> test)                             |     |
|                       |                          |                          | Opposite | KO    | 16.44                        | 2.222 |                                                               |     |
|                       |                          | Swimming speed (s)       | -        | WT    | 172.1                        | 11.17 | -                                                             |     |
|                       |                          |                          | -        | HET   | 182.5                        | 8.799 | p=0.4935 (One-way ANOVA + B)                                  |     |
| -                     | KO                       |                          | 179.7    | 11.41 | p=0.6133 (One-way ANOVA + B) |       |                                                               |     |
| <b>Marble burying</b> | WT=25<br>HET=25<br>KO=27 | Number of marble buried  | -        | WT    | 11.11                        | 1.158 | -                                                             | S5b |
|                       |                          |                          | -        | HET   | 10.92                        | 1.283 | p>0.9999 (One-way ANOVA + B)                                  |     |
|                       |                          |                          | -        | KO    | 11.93                        | 1.081 | p>0.9999 (One-way ANOVA + B)                                  |     |
| <b>Grooming</b>       | WT=7<br>HET=6<br>KO=8    | Duration of grooming (s) | -        | WT    | 30.71                        | 6.494 | -                                                             | S5c |
|                       |                          |                          | -        | HET   | 26.33                        | 7.306 | p>0.9999 (One-way ANOVA + B)                                  |     |
|                       |                          |                          | -        | KO    | 28.25                        | 4.527 | p>0.9999 (One-way ANOVA + B)                                  |     |

<sup>1</sup>One-way ANOVA + B: One-way ANOVA with Bonferroni's Multiple Comparison Test

<sup>2</sup>Kruskal-Wallis test +D: Kruskal-Wallis test with Dunn's Multiple Comparison Test

<sup>3</sup>Two-way ANOVA + B: One-way ANOVA with Bonferroni's Multiple Comparison Test

<sup>4</sup>Two-way ANOVA + D: One-way ANOVA with Dunn's Multiple Comparison Test
