# Supplementary material for: Autism-like social deficit generated by Dock4 deficiency is rescued by restoration of Rac1 activity and NMDA receptor function
Source: PubMed Central journal article supplement (PMC8159750; doi:10.1038/s41380-019-0472-7), 2019-08-06
Supplement: 41380_2019_472_MOESM5_ESM.pdf [file 41380_2019_472_MOESM5_ESM.pdf]

**Supplementary Table 4 Summary of abnormal behaviors exhibited by *Dock4* KO mice**

| Type of behaviors      | Test                                           | Result                                                          | Affected gender       |
|------------------------|------------------------------------------------|-----------------------------------------------------------------|-----------------------|
| Social behavior        | Three-chamber                                  | Lack of social novelty preference                               | M & F <sup>1</sup>    |
|                        | Pup retrieval                                  | Delayed pup retrieval                                           | F (M not tested)      |
| Language communication | Isolation-induced pup ultrasonic vocalizations | Increased number and duration of calls in pups during isolation | M & F                 |
| Repetitive behavior    | Homecage observation and open field            | Stereotyped circling in ~9% of female KO mice                   | F                     |
| Anxiety                | Elevated Zero-maze                             | Low mobility in the open sections                               | M & F (M more severe) |
|                        | Novel object recognition                       | Inability to distinguish familiar/novel objects                 | F                     |
| Learning and Memory    | Y-maze (spatial recognition)                   | Inability to distinguish familiar/novel arms                    | M                     |
|                        | Y-maze (spontaneous alternation)               | Decreased alternation among arms and increased total entries    | M                     |

<sup>1</sup>M: male; F: female
